# Supplementary material for: Ultrafast and Multiplexed Bacteriophage Susceptibility Testing by Surface Plasmon Resonance and Phase Imaging of Immobilized Phage Microarrays
Source: MDPI journal article supplement (doi:10.3390/chemosensors10050192), 2022-05-19
Supplement: s1 [file s1]

# Ultrafast and Multiplexed Bacteriophage Susceptibility Testing by Surface Plasmon Resonance and Phase Imaging of Immobilized Phage Microarrays: Supplementary Material

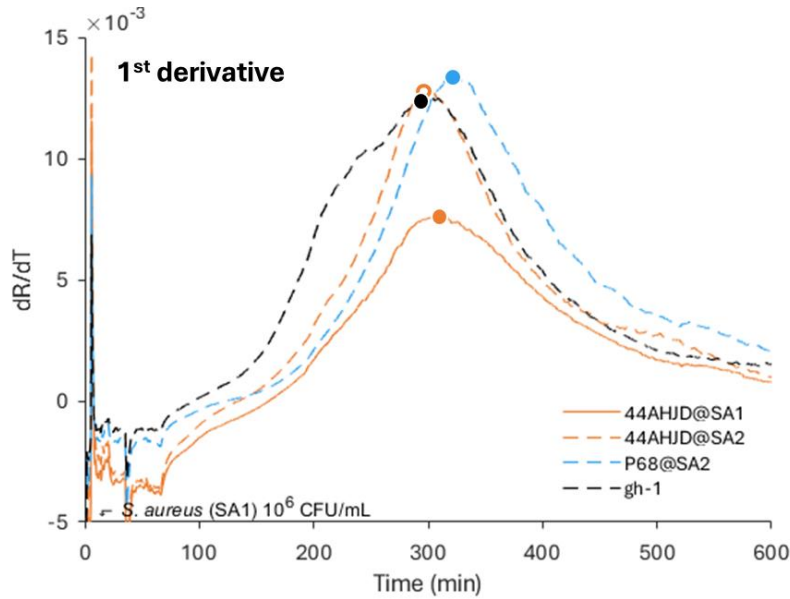

Figure S1 First derivatives of SPR responses of regions exposed to *S. aureus* SA1. On-target response of 44AHJD@SA1 to its host is indicated with a solid line. The maximum of the first derivative is indicated in each case (●). Traces show a one-minute rolling average (i.e., mean of 20 data points).

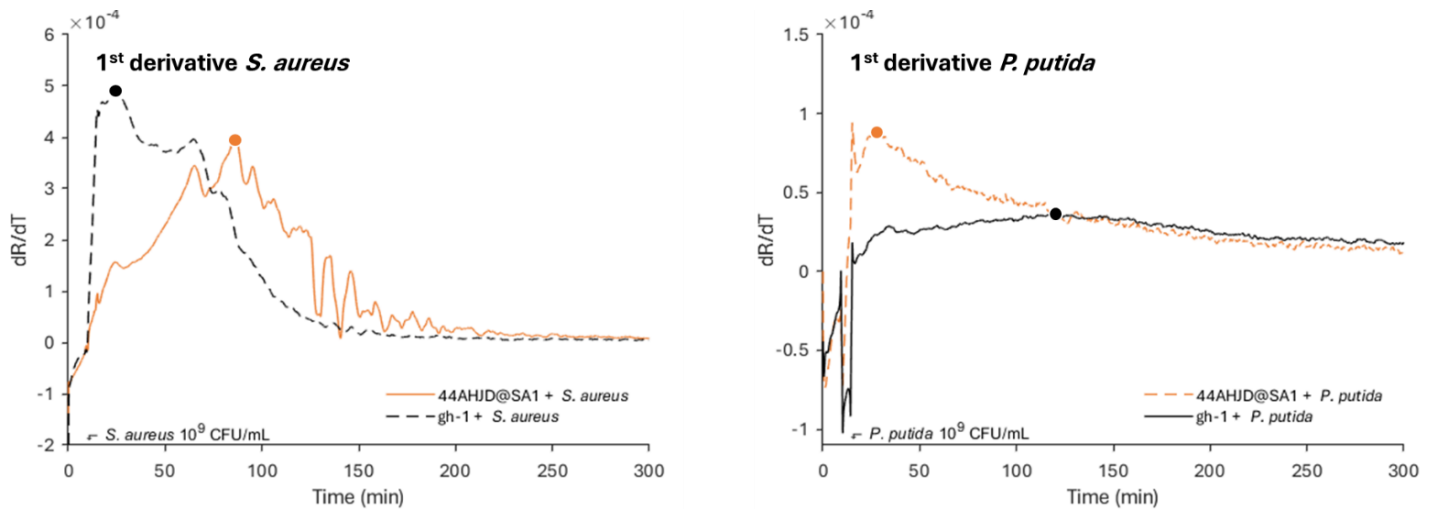

Figure S2 First derivatives of SPR responses of regions exposed to *S. aureus* and *P. putida*. Response of each immobilized phage to its host is indicated with a solid line, while response to non-host bacteria is indicated with a dashed line. The maximum of the first derivative is indicated in each case (●). Traces show a one-minute rolling average (i.e., mean of 20 data points).
